# Supplementary material
Source: PubMed Central journal article supplement (PMC5985704)
Supplement: Supplementary_material.pdf [file Supplementary_material.pdf]

## Appendix: Matrix Computation of KL Divergence

Consider 61 points spanning from -3 to 3 with 0.1 increments along each ability dimension, and

let  $\boldsymbol{\pi}_1$  denote a 61-by-D matrix, with the  $(l, d)$ th element being  $\prod_{j=1}^{n_d} P(\boldsymbol{\theta}_i^d)^{y_{ij}} (1 - P(\boldsymbol{\theta}_i^d))^{1-y_{ij}}$ .  $\boldsymbol{\pi}_2$  is

computed similarly with item parameters and the response vector from the second occasion.

Then the likelihood at every possible ability point (there are  $61^D$  points in total) forms a  $61^{D-1}$ -

by-61 matrix  $\boldsymbol{\Upsilon}_t$ , computed recursively as  $\boldsymbol{\Upsilon}_t^d = \boldsymbol{\Upsilon}_t^{d-1} \otimes \boldsymbol{\pi}_t^d$ , for  $t = 1$ , or 2, and  $D > 2$ ,  $d = 2, \dots, D$ .

$\boldsymbol{\pi}_t^d$  denotes the  $d$ th column of  $\boldsymbol{\pi}_t$ ,  $\otimes$  denotes Kronecker products, and  $\boldsymbol{\Upsilon}_t^2 = \boldsymbol{\pi}_t^1 (\boldsymbol{\pi}_t^2)^T$  when  $D = 2$ .

After expressing the posterior likelihood as a matrix operation in matrix form, the computation

of Equation 9 becomes much simpler. In all computations, only one loop with 61 iterations is

needed, regardless of the size of D.
